# Supplementary material for: Genome wide expression analysis of circular RNAs in mammary epithelial cells of cattle revealed difference in milk synthesis
Source: PeerJ. 2022 Mar 1;10:e13029. doi: 10.7717/peerj.13029 (PMC8896013; doi:10.7717/peerj.13029)
Supplement: Supplemental Information 3 [file peerj-10-13029-s003.xlsx]

## Sheet: circRNAs.pVal.FDR
chrom	circRNA_start	circRNA_end	strand	exonCount	exonSizes	exonOffsets	circType	geneName	isoformName	exonIndexOrIntronIndex	FlankingIntrons	CircularJunctionCount_Sample_1	LinearJunctionCount_Sample_1	CircularJunctionCount_Sample_2	LinearJunctionCount_Sample_2	PBI_Sample_1	PBI_Sample_2	deltaPBI(PBI_1-PBI_2)	log2fold	pValue	FDR
6	85452691	85454904	-	4	43,24,27,23,	0,134,2051,2190,	circRNA	CSN2	ENSBTAT00000003409	4,5,6,7	6:85451371-85452692|85454908-85455634	2,0,1,0	9858,0,6487,0	17,6,2,0	224134,1228180,731960,0	0.00036695	2.29e-05	0.00034406	4.67	3.97e-06	0.01185
10	46480908	46485029	-	2	132,61,	0,4060,	circRNA	USP3	ENSBTAT00000087295	13,14	10:46463789-46480908|46485029-46512580	0,0,10,4	0,0,43,102	0,1,1,1	0,18,69,86	0.16185	0.0335196	0.12833	11.2	4.29e-05	0.0407656
6	85416137	85417937	+	4	37,24,24,30,	0,477,1144,1770,	circRNA	CSN1S1	ENSBTAT00000010119A*	4,5,6,7	6:85415242-85416135|85417931-85418623	0,0,1,0	0,0,4512,0	2,0,0,0	1254543,0,0,0	0.000443066	3.19e-06	0.000439878	3.96	0.000190929	0.189974
X	74734797	74749815	+	3	94,103,216,	0,11067,14802,	circRNA	ATRX	ENSBTAT00000061308	13,14,15	X:74725235-74734797|74749815-74770303	0,0,1,1	0,0,1,1	0,1,0,2	0,6,0,65	0.666667	0.0779221	0.588745	2.7	0.00151143	1
11	103259931	103260021	+	1	90,	0,	circRNA	PAEP	ENSBTAT00000081923A*	5	11:103259246-103259921|103260026-103260679	4,0,0,0	333206,0,0,0	21,2,0,1	4902998,1861373,0,375062	2.4e-05	6.72e-06	1.73e-05	6.11	0.00327237	1
11	103257940	103259246	+	2	75,111,	0,1195,	circRNA	PAEP	ENSBTAT00000081923B*	3,4	11:103257077-103257941|103259246-103259921	0,0,0,1	0,0,0,48310	0,1,0,0	0,1378628,0,0	4.14e-05	1.45e-06	3.99e-05	2.21	0.00657113	1
6	85537902	85538025	+	1	123,	0,	circRNA	CSN1S2	ENSBTAT00000006590	11	6:85537642-85537902|85538025-85538551	1,0,0,0	7632,0,0,0	0,1,0,0	0,195163,0,0	0.000261986	1.02e-05	0.000251738	3.41	0.00808044	1
18	65661037	65661146	+	1	109,	0,	circRNA	RPS5	ENSBTAT00000021268	2	18:65660310-65661037|65661146-65664330	2,0,0,0	16302,0,0,0	11,0,0,0	22787,0,0,0	0.000245308	0.000964532	-0.000719223	3.1	0.00828557	1
6	85422657	85426501	+	5	36,24,42,27,24,	0,684,1911,2847,3820,	circRNA	CSN1S1	ENSBTAT00000010119B*	12,13,14,15,16	6:85421119-85422651|85426501-85427296	0,1,0,0	0,5765,0,0	8,8,2,6	6.53663e+23	0.000346801	2.36e-05	0.000323171	5.13	0.00896999	1
6	85450878	85452736	-	2	493,44,	0,1814,	circRNA	CSN2	ENSBTAT00000003409A*	3,4	6:85450272-85450873|85452734-85452825	1,0,0,0	22333,0,0,0	1,0,0,0	532056,0,0,0	8.95e-05	3.76e-06	8.58e-05	6.11	0.00922284	1
6	85455641	85455696	-	1	55,	0,	circRNA	CSN2	ENSBTAT00000003409B*	8	6:85454908-85455634|85455697-85457651	1,0,0,0	74848,0,0,0	1,0,0,0	1675802,0,0,0	2.67e-05	1.19e-06	2.55e-05	2.23	0.0103528	1
6	85415210	85418644	+	6	32,39,24,24,24,21,	0,925,1404,2071,2697,3413,	circRNA	CSN1S1	ENSBTAT00000010119C*	3,4,5,6,7,8	6:85413246-85415209|85418647-85420146	1,0,0,0	26710,0,0,0	1,0,0,0	555590,0,0,0	7.49e-05	3.6e-06	7.13e-05	2.11	0.0118666	1
25	26082677	26082824	-	1	147,	0,	circRNA	NUPR1	ENSBTAT00000023981	2	25:26082342-26082677|26082827-26083249	0,0,0,1	0,0,0,590	2,0,0,0	18849,0,0,0	0.00337838	0.000212168	0.00316621	1.78	0.012795	1
19	28026804	28046307	+	7	98,154,149,137,174,92,152,	0,1212,2274,4338,7612,13375,19351,	circRNA	NDEL1	ENSBTAT00000082741	2,3,4,5,6,7,8	19:28004097-28026804|28046307-28053071	0,0,0,1	0,0,0,527	0,1,0,0	0,25,0,0	0.00378072	0.0740741	-0.0702934	3.67	0.0128417	1
12	15474144	15474230	-	1	86,	0,	circRNA	TPT1	ENSBTAT00000013402	3	12:15473351-15474134|15474240-15474599	2,1,1,0	20143,19965,30938,0	5,0,0,2	20390,0,0,22637	0.00011259	0.000325271	-0.000212681	4.11	0.0151822	1
25	34128469	34128556	+	1	87,	0,	ciRNA	RHBDD2	ENSBTAT00000063604	3	25:34125393-34128562	0,0,0,1	0,0,0,537	1,0,0,0	33,0,0,0	0.00371057	0.0571429	-0.0534323	3.55	0.0200738	1
11	103259929	103260019	+	1	90,	0,	circRNA	PAEP	ENSBTAT00000081923	5	11:103259246-103259921|103260026-103260679	1,0,0,0	333206,0,0,0	1,0,0,0	4902998,0,0,0	6e-06	4.08e-07	5.59e-06	2.54	0.0222844	1
29	9552574	9605079	+	19	143,76,103,94,112,107,42,86,124,137,104,150,108,132,31,100,24,60,105,	0,3237,7111,14580,21551,22883,25102,28507,30300,30697,33272,38364,44012,45749,45976,46186,49457,50832,52400,	circRNA	PICALM	ENSBTAT00000070874	2,3,4,5,6,7,8,9,10,11,12,13,14,15,16,17,18,19,20	29:9520112-9552574|9605079-9617882	0,1,0,0	0,2055,0,0	0,0,2,0	0,0,599,0	0.00097229	0.0066335	-0.00566121	1.78	0.0264553	1
5	26811078	26811230	+	1	152,	0,	circRNA	ITGB7	ENSBTAT00000025279	14	5:26810746-26811069|26811230-26811505	0,0,0,1	0,0,0,1210	1,0,0,0	107,0,0,0	0.00165017	0.0183486	-0.0166985	6.14	0.0362573	1
7	51765684	51765767	-	1	83,	0,	circRNA	CD14	ENSBTAT00000020009	2	7:51765599-51765683|None	0,1,0,0	0,450,0,0	0,0,2,0	0,0,159,0	0.00442478	0.0245399	-0.0201151	2.67	0.0452728	1
19	46134505	46135877	-	1	1372,	0,	circRNA	KANSL1	ENSBTAT00000034753	14	19:46065215-46134505|46135877-46178174	1,0,0,0	36,0,0,0	0,2,0,0	0,11,0,0	0.0526316	0.266667	-0.214035	1.87	0.0469875	1
									A*B*C*: As we have named the circRNAs on the basis of the ensembleIDs of genes with which they are associated/related. In multiple cases more than one circRNA is associated/related with a particular gene (ensemble ID). So in order to remove any confussion we have added the suffixes A and B. The addition of suffixes is for the convenience of the readers.
