# Supplementary material for: Genome wide expression analysis of circular RNAs in mammary epithelial cells of cattle revealed difference in milk synthesis
Source: PeerJ. 2022 Mar 1;10:e13029. doi: 10.7717/peerj.13029 (PMC8896013; doi:10.7717/peerj.13029)
Supplement: Supplemental Information 4 [file peerj-10-13029-s004.xlsx]

## Sheet: DE_cirRNAs
chrom	circRNA_start	circRNA_end	strand	exonCount	circType	geneName	isoformName	pValue	FDR	UP_REG
10	46480908	46485029	-	2	circRNA	USP3	ENSBTAT00000087295	4.29e-05	0.0407656	Jersey
19	28026804	28046307	+	7	circRNA	NDEL1	ENSBTAT00000082741	0.0128417	1	Jersey
12	15474144	15474230	-	1	circRNA	TPT1	ENSBTAT00000013402	0.0151822	1	Jersey
5	26811078	26811230	+	1	circRNA	ITGB7	ENSBTAT00000025279	0.0362573	1	Jersey
7	51765684	51765767	-	1	circRNA	CD14	ENSBTAT00000020009	0.0452728	1	Jersey
19	46134505	46135877	-	1	circRNA	KANSL1	ENSBTAT00000034753	0.0469875	1	Jersey
25	34128469	34128556	+	1	ciRNA	RHBDD2	ENSBTAT00000063604	0.0200738	1	Jersey
6	85452691	85454904	-	4	circRNA	CSN2	ENSBTAT00000003409	3.97e-06	0.01185	Kashmiri cattle
6	85416137	85417937	+	4	circRNA	CSN1S1	ENSBTAT00000010119	0.000190929	0.189974	Kashmiri cattle
X	74734797	74749815	+	3	circRNA	ATRX	ENSBTAT00000061308	0.00151143	1	Kashmiri cattle
11	103259931	103260021	+	1	circRNA	PAEP	ENSBTAT00000081923	0.00327237	1	Kashmiri cattle
11	103257940	103259246	+	2	circRNA	PAEP	ENSBTAT00000081923	0.00657113	1	Kashmiri cattle
6	85537902	85538025	+	1	circRNA	CSN1S2	ENSBTAT00000006590	0.00808044	1	Kashmiri cattle
18	65661037	65661146	+	1	circRNA	NDEL1	ENSBTAT00000021268	0.00828557	1	Kashmiri cattle
6	85422657	85426501	+	5	circRNA	CSN1S1	ENSBTAT00000010119	0.00896999	1	Kashmiri cattle
6	85450878	85452736	-	2	circRNA	CSN2	ENSBTAT00000003409	0.00922284	1	Kashmiri cattle
6	85455641	85455696	-	1	circRNA	CSN2	ENSBTAT00000003409	0.0103528	1	Kashmiri cattle
6	85415210	85418644	+	6	circRNA	CSN1S1	ENSBTAT00000010119	0.0118666	1	Kashmiri cattle
25	26082677	26082824	-	1	circRNA	NUPR1	ENSBTAT00000023981	0.012795	1	Kashmiri cattle
11	103259929	103260019	+	1	circRNA	PAEP	ENSBTAT00000081923	0.0222844	1	Kashmiri cattle
29	9552574	9605079	+	19	circRNA	PICALM	ENSBTAT00000070874	0.0264553	1	Kashmiri cattle

## Sheet: Highly Expressed cirRNA_EXP
chrom	circRNA_start	circRNA_end	strand	exonCount	exonSizes	exonOffsets	circType	geneName	isoformName	exonIndexOrIntronIndex	FlankingIntrons	CircularJunctionCount_Sample_1	LinearJunctionCount_Sample_1	CircularJunctionCount_Sample_2	LinearJunctionCount_Sample_2	PBI_Sample_1	PBI_Sample_2	deltaPBI(PBI_1-PBI_2)	pValue	FDR
6	85452691	85454904	-	4	43,24,27,23,	0,134,2051,2190,	circRNA	CSN2	ENSBTAT00000003409	4,5,6,7	6:85451371-85452692|85454908-85455634	2,0,1,0	9858,0,6487,0	17,6,2,0	224134,1228180,731960,0	0.00036695	2.29e-05	0.00034406	3.97e-06	0.01185
6	85416137	85417937	+	4	37,24,24,30,	0,477,1144,1770,	circRNA	CSN1S1	ENSBTAT00000010119	4,5,6,7	6:85415242-85416135|85417931-85418623	0,0,1,0	0,0,4512,0	2,0,0,0	1254543,0,0,0	0.000443066	3.19e-06	0.000439878	0.000190929	0.189974
11	103259931	103260021	+	1	90,	0,	circRNA	PAEP	ENSBTAT00000081923	5	11:103259246-103259921|103260026-103260679	4,0,0,0	333206,0,0,0	21,2,0,1	4902998,1861373,0,375062	2.4e-05	6.72e-06	1.73e-05	0.00327237	1
11	103257940	103259246	+	2	75,111,	0,1195,	circRNA	PAEP	ENSBTAT00000081923	3,4	11:103257077-103257941|103259246-103259921	0,0,0,1	0,0,0,48310	0,1,0,0	0,1378628,0,0	4.14e-05	1.45e-06	3.99e-05	0.00657113	1
6	85537902	85538025	+	1	123,	0,	circRNA	CSN1S2	ENSBTAT00000006590	11	6:85537642-85537902|85538025-85538551	1,0,0,0	7632,0,0,0	0,1,0,0	0,195163,0,0	0.000261986	1.02e-05	0.000251738	0.00808044	1
18	65661037	65661146	+	1	109,	0,	circRNA	RPS5	ENSBTAT00000021268	2	18:65660310-65661037|65661146-65664330	2,0,0,0	16302,0,0,0	11,0,0,0	22787,0,0,0	0.000245308	0.000964532	-0.000719223	0.00828557	1
6	85422657	85426501	+	5	36,24,42,27,24,	0,684,1911,2847,3820,	circRNA	CSN1S1	ENSBTAT00000010119	12,13,14,15,16	6:85421119-85422651|85426501-85427296	0,1,0,0	0,5765,0,0	8,8,2,6	6.53663e+23	0.000346801	2.36e-05	0.000323171	0.00896999	1
6	85450878	85452736	-	2	493,44,	0,1814,	circRNA	CSN2	ENSBTAT00000003409	3,4	6:85450272-85450873|85452734-85452825	1,0,0,0	22333,0,0,0	1,0,0,0	532056,0,0,0	8.95e-05	3.76e-06	8.58e-05	0.00922284	1
6	85455641	85455696	-	1	55,	0,	circRNA	CSN2	ENSBTAT00000003409	8	6:85454908-85455634|85455697-85457651	1,0,0,0	74848,0,0,0	1,0,0,0	1675802,0,0,0	2.67e-05	1.19e-06	2.55e-05	0.0103528	1
6	85415210	85418644	+	6	32,39,24,24,24,21,	0,925,1404,2071,2697,3413,	circRNA	CSN1S1	ENSBTAT00000010119	3,4,5,6,7,8	6:85413246-85415209|85418647-85420146	1,0,0,0	26710,0,0,0	1,0,0,0	555590,0,0,0	7.49e-05	3.6e-06	7.13e-05	0.0118666	1
25	26082677	26082824	-	1	147,	0,	circRNA	NUPR1	ENSBTAT00000023981	2	25:26082342-26082677|26082827-26083249	0,0,0,1	0,0,0,590	2,0,0,0	18849,0,0,0	0.00337838	0.000212168	0.00316621	0.012795	1
12	15474144	15474230	-	1	86,	0,	circRNA	TPT1	ENSBTAT00000013402	3	12:15473351-15474134|15474240-15474599	2,1,1,0	20143,19965,30938,0	5,0,0,2	20390,0,0,22637	0.00011259	0.000325271	-0.000212681	0.0151822	1
11	103259929	103260019	+	1	90,	0,	circRNA	PAEP	ENSBTAT00000081923	5	11:103259246-103259921|103260026-103260679	1,0,0,0	333206,0,0,0	1,0,0,0	4902998,0,0,0	6e-06	4.08e-07	5.59e-06	0.0222844	1

## Sheet: cirRNA_UPREG_Jersey
chrom	circRNA_start	circRNA_end	strand	exonCount	circType	geneName	isoformName	pValue	FDR	UP_REG
10	46480908	46485029	-	2	circRNA	USP3	ENSBTAT00000087295	4.29e-05	0.0407656	Jersey	Top DE cirRNA in Jersey
19	28026804	28046307	+	7	circRNA	NDEL1	ENSBTAT00000082741	0.0128417	1	Jersey
12	15474144	15474230	-	1	circRNA	TPT1	ENSBTAT00000013402	0.0151822	1	Jersey
25	34128469	34128556	+	1	ciRNA	RHBDD2	ENSBTAT00000063604	0.0200738	1	Jersey
5	26811078	26811230	+	1	circRNA	ITGB7	ENSBTAT00000025279	0.0362573	1	Jersey
7	51765684	51765767	-	1	circRNA	CD14	ENSBTAT00000020009	0.0452728	1	Jersey
19	46134505	46135877	-	1	circRNA	KANSL1	ENSBTAT00000034753	0.0469875	1	Jersey

## Sheet: cirRNA_UPREG_Kashmiri
chrom	circRNA_start	circRNA_end	strand	exonCount	circType	geneName	isoformName	pValue	FDR	UP_REG
6	85452691	85454904	-	4	circRNA	CSN2	ENSBTAT00000003409	3.97e-06	0.01185	Kashmiri cattle	TOP DE cirRNA in Kashmir Cattle
6	85416137	85417937	+	4	circRNA	CSN1S1	ENSBTAT00000010119	0.000190929	0.189974	Kashmiri cattle
X	74734797	74749815	+	3	circRNA	ATRX	ENSBTAT00000061308	0.00151143	1	Kashmiri cattle
11	103259931	103260021	+	1	circRNA	PAEP	ENSBTAT00000081923	0.00327237	1	Kashmiri cattle
11	103257940	103259246	+	2	circRNA	PAEP	ENSBTAT00000081923	0.00657113	1	Kashmiri cattle
6	85537902	85538025	+	1	circRNA	CSN1S2	ENSBTAT00000006590	0.00808044	1	Kashmiri cattle
18	65661037	65661146	+	1	circRNA	NDEL1	ENSBTAT00000021268	0.00828557	1	Kashmiri cattle
6	85422657	85426501	+	5	circRNA	CSN1S1	ENSBTAT00000010119	0.00896999	1	Kashmiri cattle
6	85450878	85452736	-	2	circRNA	CSN2	ENSBTAT00000003409	0.00922284	1	Kashmiri cattle
6	85455641	85455696	-	1	circRNA	CSN2	ENSBTAT00000003409	0.0103528	1	Kashmiri cattle
6	85415210	85418644	+	6	circRNA	CSN1S1	ENSBTAT00000010119	0.0118666	1	Kashmiri cattle
25	26082677	26082824	-	1	circRNA	NUPR1	ENSBTAT00000023981	0.012795	1	Kashmiri cattle
11	103259929	103260019	+	1	circRNA	PAEP	ENSBTAT00000081923	0.0222844	1	Kashmiri cattle
29	9552574	9605079	+	19	circRNA	PICALM	ENSBTAT00000070874	0.0264553	1	Kashmiri cattle

## Sheet: Biological Process
#term ID	term description	false discovery rate	Genes
GO:0032570	response to progesterone	5.98e-06	CSN2,CSN1S2,CSN1S1
GO:1903494	response to dehydroepiandrosterone	5.98e-06	CSN2,CSN1S2,CSN1S1
GO:1903496	response to 11-deoxycorticosterone	5.98e-06	CSN2,CSN1S2,CSN1S1
GO:0032355	response to estradiol	1.19e-05	CSN2,CSN1S2,CSN1S1
GO:0033993	response to lipid	0.00016	CSN2,CSN1S2,CSN1S1,CD14
GO:0060416	response to growth hormone	0.0014	CSN1S2,CSN1S1
GO:1901700	response to oxygen-containing compound	0.0014	CSN2,CSN1S2,CSN1S1,CD14
GO:0042493	response to drug	0.0058	CSN2,CSN1S2,CSN1S1
GO:0098869	cellular oxidant detoxification	0.0068	CSN2,CSN1S1

## Sheet: Mol_functions
#term ID	term description	false discovery rate	Genes
GO:0016209	antioxidant activity	0.0176	CSN2,CSN1S1

## Sheet: CC
#term ID	term description	false discovery rate	Genes
GO:0005796	Golgi lumen	1.46e-06	CSN2,CSN1S2,CSN1S1
GO:0005576	extracellular region	0.00028	CSN2,CSN1S2,CSN1S1,TPT1,PAEP,CD14
GO:0005794	Golgi apparatus	0.0025	CSN2,CSN1S2,CSN1S1,CD14
GO:0005615	extracellular space	0.0026	CSN2,CSN1S2,CSN1S1,TPT1
GO:0012505	endomembrane system	0.0106	CSN2,CSN1S2,CSN1S1,TPT1,CD14
