# Supplementary material for: Genome wide expression analysis of circular RNAs in mammary epithelial cells of cattle revealed difference in milk synthesis
Source: PeerJ. 2022 Mar 1;10:e13029. doi: 10.7717/peerj.13029 (PMC8896013; doi:10.7717/peerj.13029)
Supplement: Supplemental Information 5 [file peerj-10-13029-s005.xlsx]

## Sheet: KEGG
#Term	ID	Input number	Background number	P-Value	Corrected P-Value	Input			##FDR correction method: Benjamini and Hochberg
Intestinal immune network for IgA production	bta04672	1	56	0.029139	0.0441847	ITGB7
Pertussis	bta05133	1	77	0.0396732	0.0557829	CD14
Prolactin signaling pathway	bta04917	1	83	0.0426633	0.0578824	CSN2
Salmonella infection	bta05132	1	85	0.0436581	0.0588877	CD14
ECM-receptor interaction	bta04512	1	87	0.0446519	0.0595139	ITGB7
NF-kappa B signaling pathway	bta04064	1	102	0.0520748	0.0663811	CD14
Toll-like receptor signaling pathway	bta04620	1	110	0.0560116	0.0702416	CD14
Cell adhesion molecules (CAMs)	bta04514	1	159	0.0797937	0.0925607	ITGB7
MAPK signaling pathway	bta04010	1	292	0.141557	0.14996	CD14
PI3K-Akt signaling pathway	bta04151	1	373	0.177253	0.185237	ITGB7
--------------------

## Sheet: GO
#Term	ID	Input number	Background number	P-Value	Corrected P-Value	Input
response to 11-deoxycorticosterone	GO:1903496	3	5	6.2931e-09	7.3e-07	CSN1S2|CSN2|CSN1S1
response to dehydroepiandrosterone	GO:1903494	3	5	6.2931e-09	7.3e-07	CSN1S2|CSN2|CSN1S1
Golgi lumen	GO:0005796	3	7	1.34768e-08	1.04221e-06	CSN1S2|CSN2|CSN1S1
response to progesterone	GO:0032570	3	14	7.62026e-08	4.41975e-06	CSN1S2|CSN2|CSN1S1
response to estradiol	GO:0032355	3	17	1.27632e-07	5.92214e-06	CSN1S2|CSN2|CSN1S1
response to growth hormone	GO:0060416	2	6	7.00446e-06	0.000270839	CSN1S2|CSN1S1
antioxidant activity	GO:0016209	2	15	3.39301e-05	0.00112454	CSN2|CSN1S1
protein binding	GO:0005515	3	224	0.000201949	0.0052058	ATRX|PAEP|CSN2
Golgi apparatus	GO:0005794	4	639	0.000270843	0.00628356	CD14|CSN1S2|CSN2|CSN1S1
cell surface	GO:0009986	3	325	0.000592788	0.011794	CD14|PICALM|ITGB7
cellular oxidant detoxification	GO:0098869	2	69	0.000610033	0.011794	CSN2|CSN1S1
synaptic vesicle	GO:0008021	2	83	0.000872723	0.0155747	PICALM|NDEL1
perinuclear region of cytoplasm	GO:0048471	3	411	0.00116269	0.0186459	NUPR1|RHBDD2|PICALM
extracellular space	GO:0005615	4	952	0.00120555	0.0186459	CSN1S2|TPT1|CSN2|CSN1S1
T cell migration	GO:0072678	1	5	0.00310527	0.0232057	ITGB7
positive regulation of nuclear cell cycle DNA replication	GO:0010571	1	5	0.00310527	0.0232057	ATRX
chromo shadow domain binding	GO:0070087	1	5	0.00310527	0.0232057	ATRX
mitotic centrosome separation	GO:0007100	1	5	0.00310527	0.0232057	NDEL1
protein acetylation	GO:0006473	1	5	0.00310527	0.0232057	NUPR1
long-chain fatty acid binding	GO:0036041	1	5	0.00310527	0.0232057	PAEP
cell migration	GO:0016477	2	165	0.00330639	0.0232057	ITGB7|NDEL1
central nervous system neuron axonogenesis	GO:0021955	1	6	0.00362193	0.0232057	NDEL1
synaptic vesicle budding from presynaptic endocytic zone membrane	GO:0016185	1	6	0.00362193	0.0232057	PICALM
acute inflammatory response	GO:0002526	1	6	0.00362193	0.0232057	NUPR1
axon hillock	GO:0043203	1	6	0.00362193	0.0232057	NDEL1
DNA translocase activity	GO:0015616	1	7	0.00413835	0.0232057	ATRX
nuclear pericentric heterochromatin	GO:0031618	1	7	0.00413835	0.0232057	ATRX
Sertoli cell development	GO:0060009	1	7	0.00413835	0.0232057	ATRX
regulation of intracellular protein transport	GO:0033157	1	7	0.00413835	0.0232057	NDEL1
potassium channel inhibitor activity	GO:0019870	1	7	0.00413835	0.0232057	CSN2
meiotic spindle organization	GO:0000212	1	7	0.00413835	0.0232057	ATRX
neurofilament cytoskeleton organization	GO:0060052	1	7	0.00413835	0.0232057	NDEL1
cellular response to lipoteichoic acid	GO:0071223	1	7	0.00413835	0.0232057	CD14
positive regulation of telomere maintenance	GO:0032206	1	7	0.00413835	0.0232057	ATRX
cerebral cortex radially oriented cell migration	GO:0021799	1	7	0.00413835	0.0232057	NDEL1
modulation of age-related behavioral decline	GO:0090647	1	7	0.00413835	0.0232057	PICALM
positive regulation of aspartic-type endopeptidase activity involved in amyloid precursor protein catabolic process	GO:1902961	1	7	0.00413835	0.0232057	PICALM
DNA replication-independent nucleosome assembly	GO:0006336	1	7	0.00413835	0.0232057	ATRX
cellular response to hydroxyurea	GO:0072711	1	8	0.00465452	0.0232057	ATRX
microtubule nucleation	GO:0007020	1	8	0.00465452	0.0232057	NDEL1
clathrin heavy chain binding	GO:0032050	1	8	0.00465452	0.0232057	PICALM
retrograde axonal transport	GO:0008090	1	8	0.00465452	0.0232057	NDEL1
synaptic vesicle maturation	GO:0016188	1	9	0.00517044	0.0232057	PICALM
AP-2 adaptor complex	GO:0030122	1	9	0.00517044	0.0232057	PICALM
negative regulation of protein localization to cell surface	GO:2000009	1	9	0.00517044	0.0232057	PICALM
lipopeptide binding	GO:0071723	1	9	0.00517044	0.0232057	CD14
protein localization to chromosome, telomeric region	GO:0070198	1	10	0.00568611	0.0232057	ATRX
positive regulation of ruffle assembly	GO:1900029	1	10	0.00568611	0.0232057	NDEL1
tau protein binding	GO:0048156	1	10	0.00568611	0.0232057	PICALM
histone deubiquitination	GO:0016578	1	10	0.00568611	0.0232057	USP3
retinol binding	GO:0019841	1	10	0.00568611	0.0232057	PAEP
vesicle transport along microtubule	GO:0047496	1	10	0.00568611	0.0232057	NDEL1
1-phosphatidylinositol binding	GO:0005545	1	10	0.00568611	0.0232057	PICALM
vesicle budding from membrane	GO:0006900	1	10	0.00568611	0.0232057	PICALM
condensed nuclear chromosome, centromeric region	GO:0000780	1	11	0.00620153	0.0232057	ATRX
negative regulation of glycolytic process	GO:0045820	1	11	0.00620153	0.0232057	NUPR1
DNA damage response, signal transduction by p53 class mediator	GO:0030330	1	11	0.00620153	0.0232057	ATRX
toll-like receptor 4 signaling pathway	GO:0034142	1	11	0.00620153	0.0232057	CD14
negative regulation of cardiac muscle cell apoptotic process	GO:0010667	1	11	0.00620153	0.0232057	NUPR1
positive regulation of proteasomal protein catabolic process	GO:1901800	1	11	0.00620153	0.0232057	NUPR1
negative regulation of protein localization to plasma membrane	GO:1903077	1	11	0.00620153	0.0232057	PICALM
anchored component of external side of plasma membrane	GO:0031362	1	12	0.0067167	0.0232578	CD14
inner cell mass cell proliferation	GO:0001833	1	12	0.0067167	0.0232578	NDEL1
negative regulation of autophagosome assembly	GO:1902902	1	12	0.0067167	0.0232578	NUPR1
positive regulation of type I interferon production	GO:0032481	1	12	0.0067167	0.0232578	CD14
positive regulation of amyloid-beta formation	GO:1902004	1	12	0.0067167	0.0232578	PICALM
low-density lipoprotein particle receptor binding	GO:0050750	1	13	0.00723162	0.0236466	PICALM
seminiferous tubule development	GO:0072520	1	13	0.00723162	0.0236466	ATRX
positive regulation of endocytosis	GO:0045807	1	13	0.00723162	0.0236466	CD14
ribosomal small subunit assembly	GO:0000028	1	14	0.00774629	0.0236466	RPS5
clathrin coat assembly	GO:0048268	1	14	0.00774629	0.0236466	PICALM
histone H4-K16 acetylation	GO:0043984	1	14	0.00774629	0.0236466	KANSL1
Flemming body	GO:0090543	1	14	0.00774629	0.0236466	USP3
positive regulation of neuron death	GO:1901216	1	14	0.00774629	0.0236466	PICALM
leukocyte tethering or rolling	GO:0050901	1	14	0.00774629	0.0236466	ITGB7
negative regulation of tumor necrosis factor-mediated signaling pathway	GO:0010804	1	15	0.00826072	0.0242593	CSN2
histone H4-K8 acetylation	GO:0043982	1	15	0.00826072	0.0242593	KANSL1
histone H4-K5 acetylation	GO:0043981	1	15	0.00826072	0.0242593	KANSL1
heterotypic cell-cell adhesion	GO:0034113	1	16	0.00877489	0.0248265	ITGB7
metalloendopeptidase inhibitor activity	GO:0008191	1	16	0.00877489	0.0248265	CSN2
neuron projection extension	GO:1990138	1	16	0.00877489	0.0248265	NDEL1
cell adhesion mediated by integrin	GO:0033627	1	17	0.00928882	0.025353	ITGB7
centrosome localization	GO:0051642	1	17	0.00928882	0.025353	NDEL1
iron ion homeostasis	GO:0055072	1	17	0.00928882	0.025353	PICALM
receptor clustering	GO:0043113	1	18	0.00980249	0.02614	ITGB7
negative regulation of fibroblast proliferation	GO:0048147	1	18	0.00980249	0.02614	NUPR1
positive regulation of cell cycle	GO:0045787	1	19	0.0103159	0.0265922	NUPR1
cysteine-type endopeptidase inhibitor activity	GO:0004869	1	19	0.0103159	0.0265922	CSN2
integrin complex	GO:0008305	1	19	0.0103159	0.0265922	ITGB7
clathrin-dependent endocytosis	GO:0072583	1	20	0.0108291	0.0276083	PICALM
replication fork processing	GO:0031297	1	21	0.011342	0.0286016	ATRX
positive regulation of cytokine secretion	GO:0050715	1	22	0.0118547	0.0295731	CD14
response to heat	GO:0009408	1	23	0.0123672	0.0298873	CSN2
lysosome localization	GO:0032418	1	23	0.0123672	0.0298873	NDEL1
regulation of neuron projection development	GO:0010975	1	23	0.0123672	0.0298873	NDEL1
negative regulation of cell cycle	GO:0045786	1	25	0.0133913	0.0314795	NUPR1
chromatin binding	GO:0003682	2	349	0.0138692	0.0314795	ATRX|NUPR1
alpha-tubulin binding	GO:0043014	1	26	0.013903	0.0314795	NDEL1
MLL1 complex	GO:0071339	1	26	0.013903	0.0314795	KANSL1
positive regulation of intrinsic apoptotic signaling pathway	GO:2001244	1	26	0.013903	0.0314795	NUPR1
learning or memory	GO:0007611	1	27	0.0144144	0.0314795	PICALM
synaptic vesicle endocytosis	GO:0048488	1	27	0.0144144	0.0314795	PICALM
establishment of mitotic spindle orientation	GO:0000132	1	27	0.0144144	0.0314795	NDEL1
ribosome	GO:0005840	1	28	0.0149256	0.0314795	RPS5
response to toxic substance	GO:0009636	1	28	0.0149256	0.0314795	NUPR1
kinesin complex	GO:0005871	1	28	0.0149256	0.0314795	NDEL1
dendrite morphogenesis	GO:0048813	1	28	0.0149256	0.0314795	PICALM
hemopoiesis	GO:0030097	1	28	0.0149256	0.0314795	PICALM
intrinsic apoptotic signaling pathway in response to DNA damage by p53 class mediator	GO:0042771	1	28	0.0149256	0.0314795	NUPR1
beta-tubulin binding	GO:0048487	1	29	0.0154366	0.0316928	NDEL1
positive regulation of interleukin-8 production	GO:0032757	1	29	0.0154366	0.0316928	CD14
forebrain development	GO:0030900	1	29	0.0154366	0.0316928	ATRX
lipopolysaccharide-mediated signaling pathway	GO:0031663	1	31	0.0164577	0.0334929	CD14
lipopolysaccharide binding	GO:0001530	1	32	0.0169679	0.0336458	CD14
multivesicular body	GO:0005771	1	32	0.0169679	0.0336458	TPT1
receptor internalization	GO:0031623	1	32	0.0169679	0.0336458	PICALM
rRNA binding	GO:0019843	1	33	0.0174779	0.0343633	RPS5
clathrin-coated pit	GO:0005905	1	34	0.0179876	0.034776	PICALM
cell leading edge	GO:0031252	1	34	0.0179876	0.034776	NDEL1
protein-DNA complex	GO:0032993	1	35	0.0184971	0.0348888	NUPR1
regulation of blood pressure	GO:0008217	1	35	0.0184971	0.0348888	CSN2
positive regulation of tumor necrosis factor production	GO:0032760	1	35	0.0184971	0.0348888	CD14
receptor-mediated endocytosis	GO:0006898	1	37	0.0195152	0.0365124	CD14
protein-containing complex assembly	GO:0065003	1	38	0.020024	0.0365792	NUPR1
negative regulation of I-kappaB kinase/NF-kappaB signaling	GO:0043124	1	38	0.020024	0.0365792	CSN2
presynaptic membrane	GO:0042734	1	38	0.020024	0.0365792	PICALM
amyloid-beta binding	GO:0001540	1	39	0.0205325	0.0366425	CSN1S1
axon cytoplasm	GO:1904115	1	39	0.0205325	0.0366425	NDEL1
skeletal muscle cell differentiation	GO:0035914	1	39	0.0205325	0.0366425	NUPR1
clathrin-coated vesicle	GO:0030136	1	40	0.0210407	0.0372629	PICALM
SNARE binding	GO:0000149	1	42	0.0220564	0.0384444	PICALM
positive regulation of interferon-gamma production	GO:0032729	1	42	0.0220564	0.0384444	CD14
chromosome segregation	GO:0007059	1	43	0.0225639	0.0384444	NDEL1
cytosolic small ribosomal subunit	GO:0022627	1	43	0.0225639	0.0384444	RPS5
endosomal transport	GO:0016197	1	43	0.0225639	0.0384444	PICALM
extracellular region	GO:0005576	2	454	0.0227021	0.0384444	CD14|PAEP
cytoplasmic ribonucleoprotein granule	GO:0036464	1	46	0.0240849	0.0401993	USP3
methylated histone binding	GO:0035064	1	46	0.0240849	0.0401993	ATRX
positive regulation of catalytic activity	GO:0043085	1	47	0.0245914	0.0407515	NUPR1
substrate adhesion-dependent cell spreading	GO:0034446	1	49	0.0256037	0.0415389	ITGB7
cytoplasmic microtubule	GO:0005881	1	49	0.0256037	0.0415389	TPT1
negative regulation of DNA-binding transcription factor activity	GO:0043433	1	49	0.0256037	0.0415389	NUPR1
endopeptidase activity	GO:0004175	1	50	0.0261095	0.0420653	RHBDD2
insulin receptor signaling pathway	GO:0008286	1	51	0.026615	0.0422924	NDEL1
positive regulation of NIK/NF-kappaB signaling	GO:1901224	1	51	0.026615	0.0422924	CD14
axonogenesis	GO:0007409	1	52	0.0271203	0.0425129	PICALM
male gonad development	GO:0008584	1	52	0.0271203	0.0425129	NUPR1
positive regulation of nucleic acid-templated transcription	GO:1903508	1	54	0.0281302	0.0438	NUPR1
protein homodimerization activity	GO:0042803	2	514	0.0285622	0.0441762	CSN1S2|CSN2
regulation of protein stability	GO:0031647	1	56	0.029139	0.0441847	USP3
chromatin remodeling	GO:0006338	1	62	0.0321597	0.0484484	ATRX
phosphatidylinositol-4,5-bisphosphate binding	GO:0005546	1	63	0.0326623	0.0486975	PICALM
kinetochore	GO:0000776	1	64	0.0331647	0.0486975	NDEL1
cell-matrix adhesion	GO:0007160	1	64	0.0331647	0.0486975	ITGB7
PML body	GO:0016605	1	64	0.0331647	0.0486975	ATRX
thiol-dependent ubiquitin-specific protease activity	GO:0004843	1	66	0.0341687	0.0495446	USP3
mitotic cell cycle	GO:0000278	1	69	0.0356728	0.051087	USP3
integrin-mediated signaling pathway	GO:0007229	1	69	0.0356728	0.051087	ITGB7
negative regulation of inflammatory response	GO:0050728	1	74	0.0381749	0.0543348	CSN2
response to bacterium	GO:0009617	1	79	0.0406709	0.0565009	CD14
activation of GTPase activity	GO:0090630	1	79	0.0406709	0.0565009	NDEL1
multicellular organism growth	GO:0035264	1	80	0.0411694	0.0565165	ATRX
spindle pole	GO:0000922	1	80	0.0411694	0.0565165	TPT1
defense response to bacterium	GO:0042742	1	83	0.0426633	0.0578824	CSN1S2
cellular response to lipopolysaccharide	GO:0071222	1	87	0.0446519	0.0595139	CD14
integrin binding	GO:0005178	1	88	0.0451485	0.0595139	ITGB7
neuron migration	GO:0001764	1	88	0.0451485	0.0595139	NDEL1
negative regulation of gene expression	GO:0010629	1	99	0.0505946	0.0655751	PICALM
signaling receptor activity	GO:0038023	1	102	0.0520748	0.0663811	ITGB7
Rab GTPase binding	GO:0017137	1	103	0.0525678	0.0666433	PICALM
nucleus	GO:0005634	4	2955	0.0593822	0.0740681	ATRX|NUPR1|USP3|PICALM
histone binding	GO:0042393	1	119	0.0604223	0.0749625	USP3
membrane raft	GO:0045121	1	123	0.0623765	0.0769752	CD14
DNA repair	GO:0006281	1	124	0.0628644	0.0771669	USP3
translation	GO:0006412	1	128	0.0648138	0.0787267	RPS5
protein stabilization	GO:0050821	1	128	0.0648138	0.0787267	CSN1S1
identical protein binding	GO:0042802	2	813	0.0652496	0.0788432	PAEP|NDEL1
endocytosis	GO:0006897	1	132	0.0667594	0.0802496	PICALM
focal adhesion	GO:0005925	1	133	0.0672452	0.0804169	ITGB7
nucleoplasm	GO:0005654	3	1867	0.0683423	0.0813098	NUPR1|RHBDD2|USP3
mRNA binding	GO:0003729	1	149	0.0749861	0.0887591	RPS5
serine-type endopeptidase activity	GO:0004252	1	154	0.0773928	0.0911428	RHBDD2
neuronal cell body	GO:0043025	1	156	0.0783539	0.0913473	PICALM
structural constituent of ribosome	GO:0003735	1	156	0.0783539	0.0913473	RPS5
transcription coactivator activity	GO:0003713	1	163	0.0817102	0.0938454	NUPR1
early endosome	GO:0005769	1	164	0.0821888	0.09393	PICALM
microtubule binding	GO:0008017	1	188	0.0936042	0.105933	NDEL1
inflammatory response	GO:0006954	1	190	0.0945495	0.106483	CD14
ubiquitin-dependent protein catabolic process	GO:0006511	1	197	0.0978507	0.108622	USP3
spermatogenesis	GO:0007283	1	198	0.0983214	0.108622	ATRX
positive regulation of GTPase activity	GO:0043547	1	222	0.109549	0.119884	PICALM
innate immune response	GO:0045087	1	225	0.110944	0.12084	CD14
negative regulation of cell population proliferation	GO:0008285	1	228	0.112336	0.121785	NUPR1
external side of plasma membrane	GO:0009897	1	236	0.116039	0.125214	CD14
Golgi membrane	GO:0000139	1	253	0.123859	0.133034	RHBDD2
positive regulation of transcription, DNA-templated	GO:0045893	1	266	0.129796	0.138768	PICALM
nuclear chromatin	GO:0000790	1	285	0.138405	0.147293	USP3
proteolysis	GO:0006508	1	368	0.17509	0.183805	RHBDD2
centrosome	GO:0005813	1	375	0.178116	0.185305	NDEL1
DNA binding	GO:0003677	1	517	0.237314	0.24579	NUPR1
calcium ion binding	GO:0005509	1	560	0.25444	0.262355	TPT1
zinc ion binding	GO:0008270	1	664	0.294387	0.302203	USP3
cytoplasm	GO:0005737	2	2867	0.446226	0.456055	USP3|TPT1
metal ion binding	GO:0046872	1	1164	0.460064	0.468135	ATRX
ATP binding	GO:0005524	1	1275	0.49154	0.497979	ATRX
plasma membrane	GO:0005886	1	2339	0.717664	0.723904	PICALM
cytosol	GO:0005829	1	2482	0.739593	0.742795	TPT1
integral component of membrane	GO:0016021	1	3697	0.871349	0.871349	RHBDD2
